# Supplementary material for: Body-size structure of Central Iberian mammal fauna reveals semidesertic conditions during the middle Miocene Global Cooling Event
Source: PLoS One. 2017 Oct 26;12(10):e0186762. doi: 10.1371/journal.pone.0186762 (PMC5658084; doi:10.1371/journal.pone.0186762)
Supplement: S2 Table — (XLSX) [file pone.0186762.s002.xlsx]

## Sheet: Matriz final
Supplementary Materials Table 2. Modern Asian faunas used in this work, body size data and climatic parameters for each locality.
Geographic data								Body size categories (%) a									Climatic data b
Continent	Transect	Country	Locality	Latitude	Longitude	Altitude (m)		A	B	C	D	E	F	G	H		Biome	T (°C)	Tmin (°C)	Tmax (°C)	Atm (°C)	P (mm)	D (months)
Asia	3	Afghanistan	Kandahar	31°36'N	65°40'E	1055		45.00	20.00	15.00	15.00	0.00	0.00	0.00	5.00		III	17.8	6.4	28.9	22.5	177.8	9
		Pakistan	Jacobabad	28°17'N	68°29'E	57		26.32	31.58	10.53	21.05	5.26	0.00	0.00	5.26		III	26.9	14.7	37.5	22.8	88.9	12
			Multan	30°12'N	71°31'E	126		33.33	28.57	9.52	19.05	4.76	0.00	0.00	4.76		III	26.1	13.6	35.6	21.9	167.64	12
		India	Bikaner	28°00'N	73°18'E	224		23.81	33.33	9.52	19.05	4.76	4.76	0.00	4.76		II/III	26.4	14.7	35.3	20.6	292.1	10
			Jodhpur	26°18'N	73°01'E	238		28.57	25.00	10.71	21.43	7.14	3.57	0.00	3.57		II/III	26.1	16.7	33.9	17.2	355.6	9
			Jaipur	26°55'N	75°50'E	436		29.03	25.81	9.68	22.58	3.23	6.45	0.00	3.23		II/III	25.6	15.8	33.3	17.5	607.06	9
			New Delhi	28°35'N	77°12'E	218		20.00	28.00	12.00	24.00	4.00	8.00	0.00	4.00		II/III	25.0	13.9	33.6	19.7	640.08	8
			Agra	27°08'N	78°01'E	169		19.23	23.08	11.54	26.92	7.69	7.69	0.00	3.85		II/III	24.7	14.4	34.4	20.0	680.72	9
			Cawnpore	26°28'N	80°21'E	127		20.00	20.00	12.00	28.00	8.00	8.00	0.00	4.00		II	25.6	15.8	33.6	17.8	822.96	8
			Patna	25°37'N	85°10'E	53		19.23	19.23	11.54	23.08	7.69	11.54	0.00	7.69		II	25.8	16.7	32.2	15.6	1183.64	6
			Dhubri	26°01'N	89°59'E	35		23.08	23.08	15.38	23.08	3.85	3.85	0.00	7.69		I/II	24.2	17.5	28.1	10.6	2451.1	5
			Silchar	24°49'N	92°48'E	29		21.95	31.71	14.63	14.63	4.88	2.44	0.00	9.76		I	24.7	18.6	28.6	10.0	3187.7	3
		Nepal	Katmandu	27°42'N	85°12'E	1338		34.15	24.39	14.63	14.63	4.88	2.44	0.00	4.88		I/II	18.6	10.0	24.4	14.4	1427.48	5
	4	Pakistan	Hyderabad	17°26'N	78°27'E	542		35.00	35.00	10.00	15.00	5.00	0.00	0.00	0.00		III	26.9	17.5	34.2	16.7	175.26	11
			Karachi	23°02'N	72°35'E	4		33.33	38.10	9.52	14.29	4.76	0.00	0.00	0.00		III	25.6	18.9	30.8	11.9	195.58	11
		India	Ahmadabad	23°02'N	72°35'E	50		38.46	23.08	7.69	23.08	3.85	3.85	0.00	0.00		II/III	28.3	21.9	33.9	11.9	726.44	8
			Surat	21°12'N	72°50'E	12		24.00	24.00	24.00	20.00	4.00	4.00	0.00	0.00		II	26.9	22.5	31.1	8.6	1059.18	8
			Bombay	18°54'N	72°49'E	11		30.00	30.00	16.67	13.33	3.33	3.33	0.00	3.33		II	26.9	23.9	29.7	5.8	1808.48	7
			Poona	18°32'N	73°51'E	559		33.33	22.22	13.89	16.67	5.56	5.56	0.00	2.78		II/III	25.0	20.6	29.7	9.2	668.02	7
			Sholapur	17°40'N	75°54'E	479		28.57	17.86	14.29	21.43	7.14	7.14	0.00	3.57		II	27.2	22.2	32.8	10.6	685.8	7
			Ratnagiri	16°59'N	73°18'E	64		26.92	26.92	23.08	15.38	3.85	3.85	0.00	0.00		I/II	26.7	24.4	29.4	5.0	2593.34	7
			Mormugao	15°25'N	73°47'E	62		26.92	26.92	23.08	15.38	3.85	3.85	0.00	0.00		I/II	26.9	25.3	29.7	4.4	2413	6
			Bellary	15°09'N	76°51'E	449		34.48	20.69	13.79	17.24	6.90	6.90	0.00	0.00		II/III	27.5	23.3	32.2	8.9	510.54	8
			Mangalore	12°52'N	74°51'E	22		32.26	25.81	22.58	12.90	3.23	3.23	0.00	0.00		I/II	26.9	26.1	29.4	3.3	3291.84	5
			Bangalore	12°57'N	77°37'E	921		29.41	23.53	14.71	14.71	5.88	5.88	0.00	5.88		II	23.6	20.6	27.2	6.7	868.68	5
			Cochin	09°58'N	76°14'E	3		21.88	28.13	21.88	12.50	6.25	3.13	0.00	6.25		I/II	27.5	26.1	29.7	3.6	2928.62	4
			Trivandrum	08°29'N	76°57'E	61		16.00	32.00	24.00	16.00	8.00	4.00	0.00	0.00		I/II	26.4	25.6	28.3	2.8	1696.72	3
a body size categories A-H as in Table 1.
b biome, after Walter’s (1985) climatic typology, I = evergreen tropical rainforest, I/II = tropical semievergreen forest, II = tropical deciduous woodland, II/III = savanna, III = subtropical desert; T, mean annual temperature; Tmin, mean temperature of the coldest month; Tmax, mean temperature of the warmest month; Mta, mean annual thermal amplitude; P, annual total precipitation; D, drought le…
