# Supplementary material for: Body-size structure of Central Iberian mammal fauna reveals semidesertic conditions during the middle Miocene Global Cooling Event
Source: PLoS One. 2017 Oct 26;12(10):e0186762. doi: 10.1371/journal.pone.0186762 (PMC5658084; doi:10.1371/journal.pone.0186762)
Supplement: S4 Table — (XLSX) [file pone.0186762.s004.xlsx]

## Sheet: Hoja1
Supplementary Materials Table 4. Modern Palaeotropical faunas used for models validation, body size data and climatic parameters for each locality.
Geographic data							Body size categories (%) a									Climatic data b
Continent	Country	Locality	Latitude	Longitude	Altitude (m)		A	B	C	D	E	F	G	H		Biome	T (°C)	Tmin (°C)	Tmax (°C)	Atm (°C)	P (mm)	D (months)
Africa	Liberia	Greenville	05°04'N	09°04'W	10		36.11	15.28	22.22	13.89	4.17	0.00	4.17	4.17		I	26.3	25.3	27.3	2.0	4615	0
	Sierra Leone	Sebwerma	07°59'N	10°52'W	185		41.43	15.71	24.29	10.00	4.29	0.00	2.86	1.43		I/II	26.2	24.9	27.6	2.7	2545	3
	Senegal	Ziguinchor	12°35'N	16°16'W	10		32.79	14.75	2017-11-13	14.75	9.84	3.28	3.28	8.20		II	26.8	24.0	28.5	4.5	1626	7
	Senegal	Linguere	15°23'N	15°07'W	21		40.74	14.81	22.22	2017-11-11	7.41	0.00	3.70	0.00		II/III	28.2	24.2	31.4	7.3	496	9
	W Sahara	Smara	26°44'N	25°55'W	140		66.67	0.00	2017-11-11	22.22	0.00	0.00	0.00	0.00		III	21.7	14.8	27.7	12.9	36	12
Asia	Myanmar	Putao	27°20'N	97°25'E	409		29.17	2017-08-27	18.75	10.42	2017-08-02	2017-08-02	0.00	10.42		I	19.1	11.1	24.7	13.6	3533	3
	Bangladesh	Dacca Tezgaon	23°46'N	90°23'E	7		11.76	29.41	23.53	17.65	5.88	5.88	0.00	5.88		I/II	25.8	19.2	28.9	9.7	1877	4
	India	Raipur	21°14'N	89°39'E	296		16.00	28.00	16.00	20.00	8.00	8.00	0.00	4.00		II	26.7	20.0	34.7	14.7	1334	7
	India	Kota	25°11'N	75°51'E	257		24.00	24.00	12.00	24.00	8.00	8.00	0.00	0.00		II/III	27.0	17.8	35.8	18.0	750	8
	Pakistan	Kanphur	28°39'N	70°41'E	91		38.89	27.78	5.56	22.22	5.56	0.00	0.00	0.00		III	26.3	14.5	35.8	21.3	105	12
a body size categories A-H as in Table 1.
b biome, after Walter’s (1985) climatic typology, I = evergreen tropical rainforest, I/II = tropical semievergreen forest, II = tropical deciduous woodland, II/III = savanna, III = subtropical desert; T, mean annual temperature; Tmin, mean temperature of the coldest month; Tmax, mean temperature of the warmest month; Mta, mean annual thermal amplitude; P, annual total precipitation; D, drought le…
