# Supplementary material for: Body-size structure of Central Iberian mammal fauna reveals semidesertic conditions during the middle Miocene Global Cooling Event
Source: PLoS One. 2017 Oct 26;12(10):e0186762. doi: 10.1371/journal.pone.0186762 (PMC5658084; doi:10.1371/journal.pone.0186762)
Supplement: S5 Table — (XLSX) [file pone.0186762.s005.xlsx]

## Sheet: Hoja1
Supplementary Materials Table 5. Coefficients and their significance for the regression models for climatic inference based on the body size structure of the three faunal datasets.
		Palaeotropics					Asia					Africa
Dependent variable a	Analysis	Body size variables b	Model c	r²	p		Body size variables b	Model c	r²	p		Body size variables b	Model c	r²	p
T (Cº)	OLS multiple linear regression	A,E	L	0.381	<0.001		H	L	0.154	0.043		A,G	L	0.378	<0.001
	OLS univariate regression	A	L	0.347	<0.001		A	L		-		A	L	0.282	0.001
			Q	0.419	<0.001			Q		-			Q	0.294	0.003
			E	0.351	<0.001			E		-			E	0.282	0.001
		B	L	0.262	<0.001		B	L		-		B	L	0.155	0.017
			Q	0.290	<0.001			Q		-			Q	0.167	0.049
			E	0.254	<0.001			E		-			E	0.150	0.020
		C	L		-		C	L		-		C	L	0.142	0.024
			Q		-			Q		-			Q	0.146	0.074
			E		-			E		-			E	0.146	0.022
		D	L		-		D	L		-		D	L		-
			Q		-			Q		-			Q		-
			E		-			E		-			E		-
		E	L	0.104	0.010		E	L		-		E	L	0.271	0.001
			Q	0.128	0.016			Q		-			Q	0.288	0.004
			E	0.106	0.009			E		-			E	0.262	0.001
		F	L	0.125	0.004		F	L		-		F	L		-
			Q	0.145	0.009			Q		-			Q		-
			E	0.128	0.004			E		-			E		-
		G	L	0.343	<0.001		G	L		-		G	L	0.259	0.002
			Q	0.357	<0.001			Q		-			Q	0.294	0.003
			E	0.327	<0.001			E		-			E	0.243	0.002
		H	L		-		H	L	0.154	0.043		H	L		-
			Q		-			Q	0.192	0.077			Q		-
			E		-			E	0.134	0.060			E		-
Tmin (C°)	OLS multiple linear regression	C,D,E,G	L	0.509	<0.001		C,H	L	0.480	<0.001		A,D,G	L	0.382	0.001
	OLS univariate regression	A	L	0.073	0.032		A	L		-		A	L	0.330	<0.001
			Q	0.183	0.002			Q		-			Q	0.360	0.001
			E	0.088	0.018			E		-			E	0.349	<0.001
		B	L		-		B	L		-		B	L	0.238	0.003
			Q		-			Q		-			Q	0.238	0.011
			E		-			E		-			E	0.247	0.002
		C	L	0.285	<0.001		C	L	0.387	0.001		C	L	0.257	0.002
			Q	0.286	<0.001			Q	0.440	0.001			Q	0.262	0.007
			E	0.241	<0.001			E	0.243	0.009			E	0.269	0.001
		D	L	0.092	0.015		D	L		-		D	L	0.135	0.028
			Q	0.095	0.051			Q		-			Q	0.174	0.043
			E	0.078	0.027			E		-			E	0.168	0.013
		E	L	0.193	<0.001		E	L		-		E	L	0.322	<0.001
			Q	0.207	0.001			Q		-			Q	0.324	0.002
			E	0.223	<0.001			E		-			E	0.350	<0.001
		F	L		-		F	L		-		F	L		-
			Q		-			Q		-			Q		-
			E		-			E		-			E		-
		G	L	0.148	0.002		G	L		-		G	L	0.556	<0.001
			Q	0.198	0.001			Q		-			Q	0.579	<0.001
			E	0.132	0.003			E		-			E	0.567	<0.001
		H	L		-		H	L	0.215	0.015		H	L		-
			Q		-			Q	0.363	0.004			Q		-
			E		-			E	0.173	0.031			E		-
Tmax (C°)	OLS multiple linear regression	B,C,D,F	L	0.583	<0.001		C,D	L	0.465	0.001		n.a	L	n.a	n.a
	OLS univariate regression	A	L	0.372	<0.001		A	L		-		A	L		-
			Q	0.376	<0.001			Q		-			Q		-
			E	0.365	<0.001			E		-			E		-
		B	L	0.426	<0.001		B	L		-		B	L		-
			Q	0.433	<0.001			Q		-			Q		-
			E	0.405	<0.001			E		-			E		-
		C	L	0.106	0.009		C	L	0.341	0.001		C	L		-
			Q	0.246	<0.001			Q	0.528	<0.001			Q		-
			E	0.085	0.021			E	0.320	0.002			E		-
		D	L	0.328	<0.001		D	L	0.345	0.001		D	L		-
			Q	0.334	<0.001			Q	0.385	0.003			Q		-
			E	0.291	<0.001			E	0.341	0.001			E		-
		E	L		-		E	L		-		E	L		-
			Q		-			Q		-			Q		-
			E		-			E		-			E		-
		F	L	0.230	<0.001		F	L		-		F	L		-
			Q	0.231	<0.001			Q		-			Q		-
			E	0.221	<0.001			E		-			E		-
		G	L	0.298	<0.001		G	L				G	L		-
			Q	0.451	<0.001			Q					Q		-
			E	0.283	<0.001			E					E		-
		H	L		-		H	L				H	L		-
			Q		-			Q					Q		-
			E		-			E					E		-
		Palaeotropic					Asia					Africa
Dependent variable	Analysis	Body size variables	Model	r²	p		Body size variables	Model	r²	p		Body size variables	Model	r²	p
Mta (C°)	OLS multiple linear regression	B,C,D,E,F	L	0.633	<0.001		C,D	L	0.632	<0.001		A,D,G	L	0.733	<0.001
	OLS univariate regression	A	L		-		A	L				A	L	0.232	0.003
			Q		-			Q					Q	0.284	0.003
			E		-			E					E	0.183	0.009
		B	L	0.113	0.007		B	L				B	L	0.207	0.005
			Q	0.132	0.014			Q					Q	0.225	0.015
			E	0.088	0.018			E					E	0.144	0.023
		C	L	0.443	<0.001		C	L	0.584	<0.001		C	L	0.314	<0.001
			Q	0.522	<0.001			Q	0.584	<0.001			Q	0.382	<0.001
			E	0.505	<0.001			E	0.698	<0.001			E	0.367	<0.001
		D	L	0.409	<0.001		D	L	0.310	0.003		D	L	0.200	0.006
			Q	0.418	<0.001			Q	0.333	0.008			Q	0.249	0.009
			E	0.329	<0.001			E	0.345	0.001			E	0.095	0.068
		E	L	0.128	0.004		E	L		-		E	L	0.249	0.002
			Q	0.131	0.015			Q		-			Q	0.353	0.001
			E	0.098	0.013			E		-			E	0.109	0.049
		F	L	0.065	0.044		F	L		-		F	L		-
			Q	0.131	0.015			Q		-			Q		-
			E	0.075	0.030			E		-			E		-
		G	L		-		G	L		-		G	L	0.663	<0.001
			Q		-			Q		-			Q	0.666	<0.001
			E		-			E		-			E	0.644	<0.001
		H	L		-		H	L		-		H	L		-
			Q		-			Q		-			Q		-
			E		-			E		-			E		-
P (mm)	OLS multiple linear regression	C,G	L	0.240	<0.001		C,D	L	0.516	<0.001		D,G	L	0.272	0.005
	OLS univariate regression	A	L	0.070	0.036		A	L		-		A	L		-
			Q	0.070	0.112			Q		-			Q		-
			E	0.046	0.092			E		-			E		-
		B	L		-		B	L		-		B	L		-
			Q		-			Q		-			Q		-
			E		-			E		-			E		-
		C	L	0.178	0.001		C	L	0.510	<0.001		C	L	0.119	0.040
			Q	0.332	<0.001			Q	0.529	<0.001			Q	0.356	0.001
			E	0.090	0.017			E	0.476	<0.001			E	0.020	0.416
		D	L		-		D	L	0.163	0.037		D	L	0.185	0.009
			Q		-			Q	0.286	0.017			Q	0.275	0.005
			E		-			E	0.048	0.272			E	0.244	0.002
		E	L		-		E	L		-		E	L		-
			Q		-			Q		-			Q		-
			E		-			E		-			E		-
		F	L		-		F	L		-		F	L		-
			Q		-			Q		-			Q		-
			E		-			E		-			E		-
		G	L	0.092	0.016		G	L		-		G	L	0.155	0.017
			Q	0.095	0.050			Q		-			Q	0.167	0.049
			E	0.038	0.124			E		-			E	0.036	0.271
		H	L		-		H	L		-		H	L		-
			Q		-			Q		-			Q		-
			E		-			E		-			E		-
D (months)	OLS multiple linear regression	C,D	L	0.212	0.001		C	L	0.394	<0.001		D	L	0.197	0.007
	OLS univariate regression	A	L		-		A	L		-		A	L		-
			Q		-			Q		-			Q		-
			E		-			E		-			E		-
		B	L		-		B	L		-		B	L		-
			Q		-			Q		-			Q		-
			E		-			E		-			E		-
		C	L	0.147	0.002		C	L	0.394	<0.001		C	L		-
			Q	0.341	<0.001			Q	0.508	<0.001			Q		-
			E	n.a.	n.a.			E	0.367	0.001			E		-
		D	L	0.154	0.001		D	L		-		D	L	0.197	0.007
			Q	0.155	0.006			Q		-			Q	0.297	0.003
			E	n.a.	n.a.			E		-			E	n.a.	n.a.
		E	L		-		E	L		-		E	L		-
			Q		-			Q		-			Q		-
			E		-			E		-			E		-
		F	L		-		F	L		-		F	L		-
			Q		-			Q		-			Q		-
			E		-			E		-			E		-
		G	L		-		G	L		-		G	L		-
			Q		-			Q		-			Q		-
			E		-			E		-			E		-
		H	L		-		H	L		-		H	L		-
			Q		-			Q		-			Q		-
			E		-			E		-			E		-
a climatic variables; T, mean annual temperature; Tmin, mean temperature of the coldest month; Tmax, mean temperature of the warmest month; Mta, mean annual thermal amplitude; P, annual total precipitation; D, drought length
b categories A-H as in Table 1
c L, linear regression models; Q, quadratic regression models; E, exponential regression modelc
d best fitting model for each climate parameter in each data subset is shown in bold
e n.a., not available
